# Supplementary material for: Enhanced Plasmonic Biosensor Utilizing Paired Antibody and Label-Free Fe3O4 Nanoparticles for Highly Sensitive and Selective Detection of Parkinson’s α-Synuclein in Serum
Source: MDPI journal article supplement (doi:10.3390/bios11100402), 2021-10-18
Supplement: s1 [file s1]

Supplementary Materials

# Enhanced Plasmonic Biosensor Utilizing Paired Antibody and Label-free Fe<sub>3</sub>O<sub>4</sub> Nanoparticles for Highly Sensitive and Selective Detection of Parkinson's $\alpha$ -Synuclein in Serum

Samuel Husin Surya Mandala <sup>1,‡</sup>, Tai-Jan Liu <sup>2,‡</sup>, Chiung-Mei Chen <sup>3,‡</sup>, Kuo-Kang Liu <sup>4</sup>, Mochamad Januar <sup>1</sup>, Ying-Feng Chang <sup>5</sup>, Chao-Sung Lai <sup>1,5,6,7,8</sup>, Kuo-Hsuan Chang <sup>9</sup>, and Kuo-Chen Liu <sup>1,8,10\*</sup>

<sup>1</sup> Department of Electronic Engineering, Chang Gung University, Taoyuan 33302, Taiwan; samuelhusin31@gmail.com (S.H.S.M); moch.januar@outlook.com (M.J.); cslai@mail.cgu.edu.tw (C.-S.L)

<sup>2</sup> Department of Traditional Chinese Medicine, Chang Gung Memorial Hospital, Keelung 204, Taiwan; sarah78912@hotmail.com (T.-J.L)

<sup>3</sup> Department of Neurology, Chang Gung Memorial Hospital, Chang Gung University College of Medicine, Taoyuan 33302, Taiwan; cmchen@cgmh.org.tw (C.-M.C)

<sup>4</sup> School of Engineering, University of Warwick, Coventry CV4 7AL, United Kingdom; I.K.Liu@warwick.ac.uk (K.-K.L)

<sup>5</sup> Artificial Intelligence Research Center, Chang Gung University, Taoyuan 33302, Taiwan; yfchang@mail.cgu.edu.tw (Y.-F.C)

<sup>6</sup> Biosensor Group, Biomedical Engineering Research Center, Chang Gung University, Taoyuan 33302, Taiwan

<sup>7</sup> Department of Nephrology, Chang Gung Memorial Hospital, Linkou, New Taipei City 33305, Taiwan

<sup>8</sup> Department of Materials Engineering, Ming Chi University of Technology, New Taipei City 24301, Taiwan

<sup>9</sup> Department of Neurology, Chang Gung Memorial Hospital Linkou Medical Center and College of Medicine, Chang Gung University, Linkou 33305, Taiwan; gophy5128@cgmh.org.tw (K.-H.C)

<sup>10</sup> Division of Pediatric Infectious Disease, Department of Pediatrics, Chang Gung Memorial Hospital, Linkou 33305, Taiwan

\* Correspondence: jacobliu@mail.cgu.edu.tw (K.-C.L.);

‡ The three authors contributed equally to this work

## S1. Characterization of Fe<sub>3</sub>O<sub>4</sub> NPs

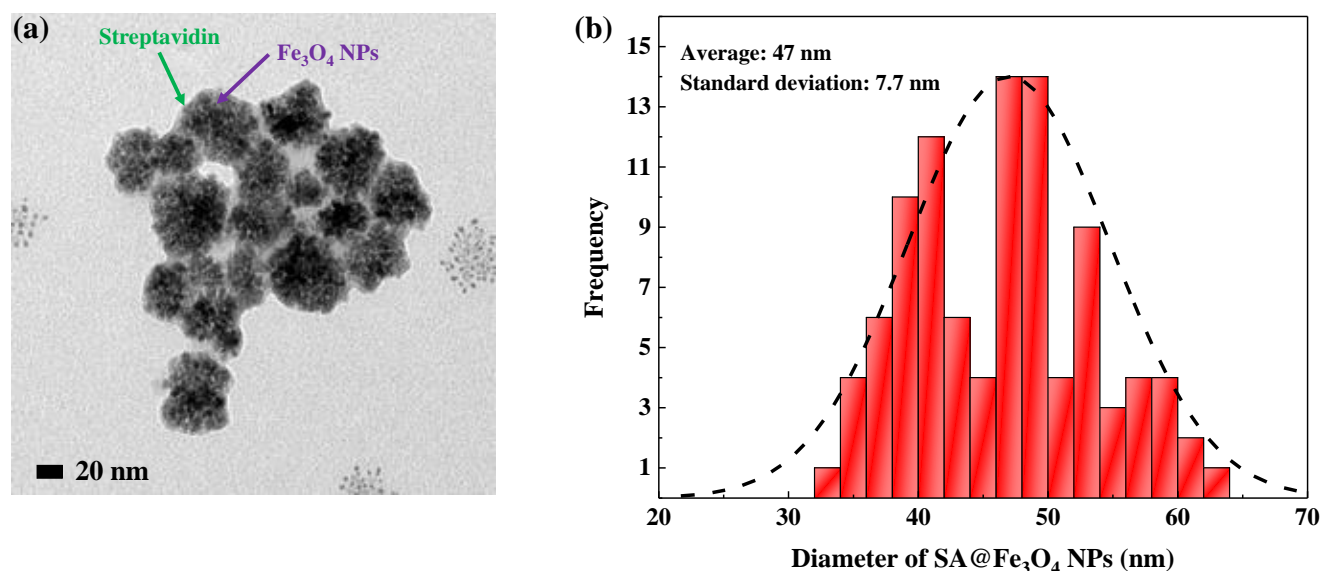

**Figure S1.** Fe<sub>3</sub>O<sub>4</sub> NPs characterization. (a) TEM image of SA@ Fe<sub>3</sub>O<sub>4</sub> NPs on a glass substrate with scale bar 20 nm. Two arrows with green and purple color denotes SA proteins (the grey dots) and Fe<sub>3</sub>O<sub>4</sub> NPs (the black dots), respectively. (b) Histogram of SA@ Fe<sub>3</sub>O<sub>4</sub> NPs size distributions and their Gaussian fitting shows the diameter of SA@ Fe<sub>3</sub>O<sub>4</sub> NPs ranging from 34 nm to 75 nm with an average nanoparticle diameter of 47 ± 7.7 nm.

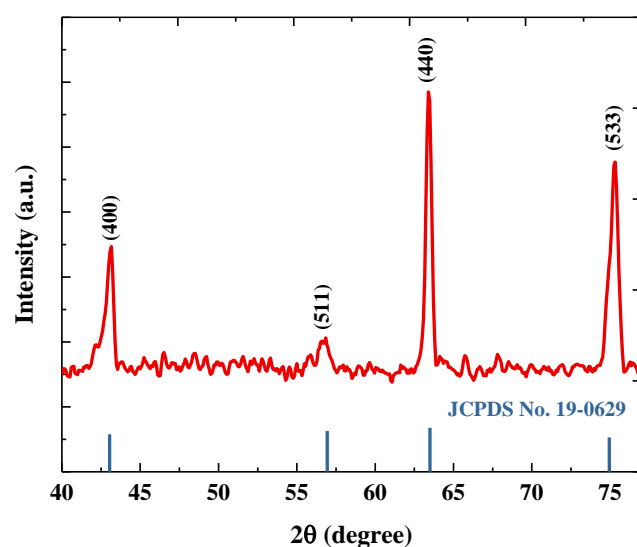

**Figure S2.** XRD patterns for the prepared SA@Fe<sub>3</sub>O<sub>4</sub> NPs (the red-color line) and the reference of the standard magnetite from JCPDS datasheet no. 19-0629 (the blue-color line).

## S2. Binding performance of the $\alpha$ -syn-RmAb and $\alpha$ -syn-MmAb

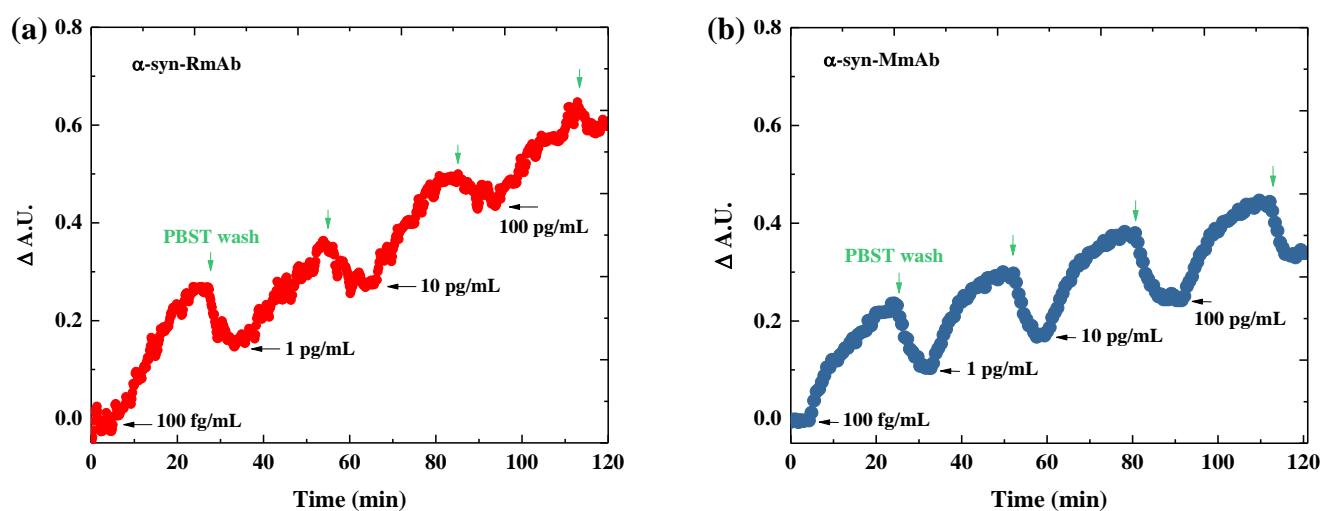

**Figure S3.** Real-time SPR signals from the detection of  $\alpha$ -syn concentration from 100 fg/mL to 100 pg/mL by using (a) monoclonal antibody derived from rabbit host ( $\alpha$ -syn-RmAb) and (b) derived from mouse host ( $\alpha$ -syn-MmAb).
